# Supplementary material for: Accretionary prism deformation and fluid migration caused by slow earthquakes in the Nankai subduction zone
Source: Copernicus journal article supplement (doi:10.5194/egusphere-2024-3405), 2024-11-25
Supplement: Supplementary file 1 [file egusphere-2024-3405-supplement.pdf]

# Supplementary Figures

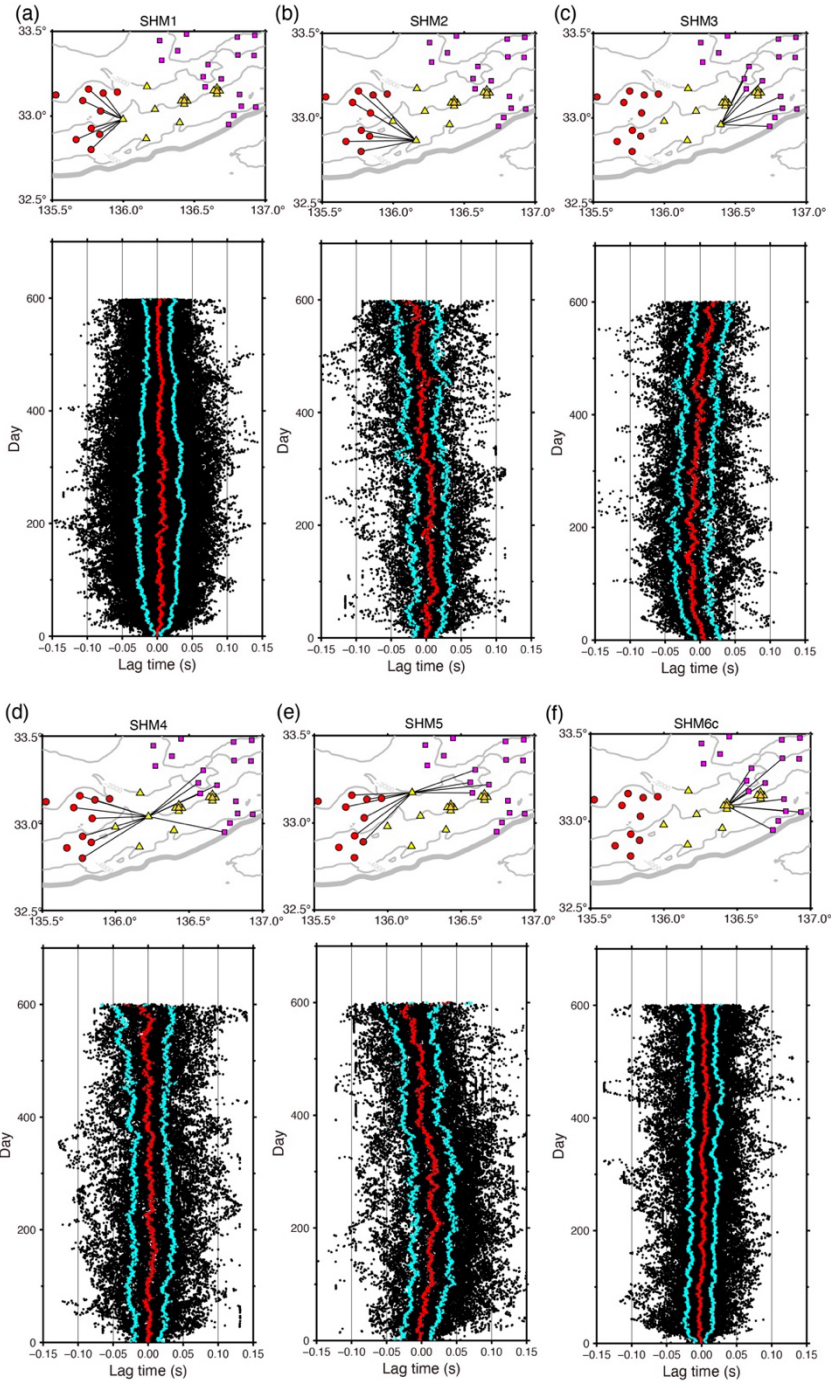

Figure S1: Same as Fig. 3, but for other OBSs.

30

35

40

45

50

55

60

65

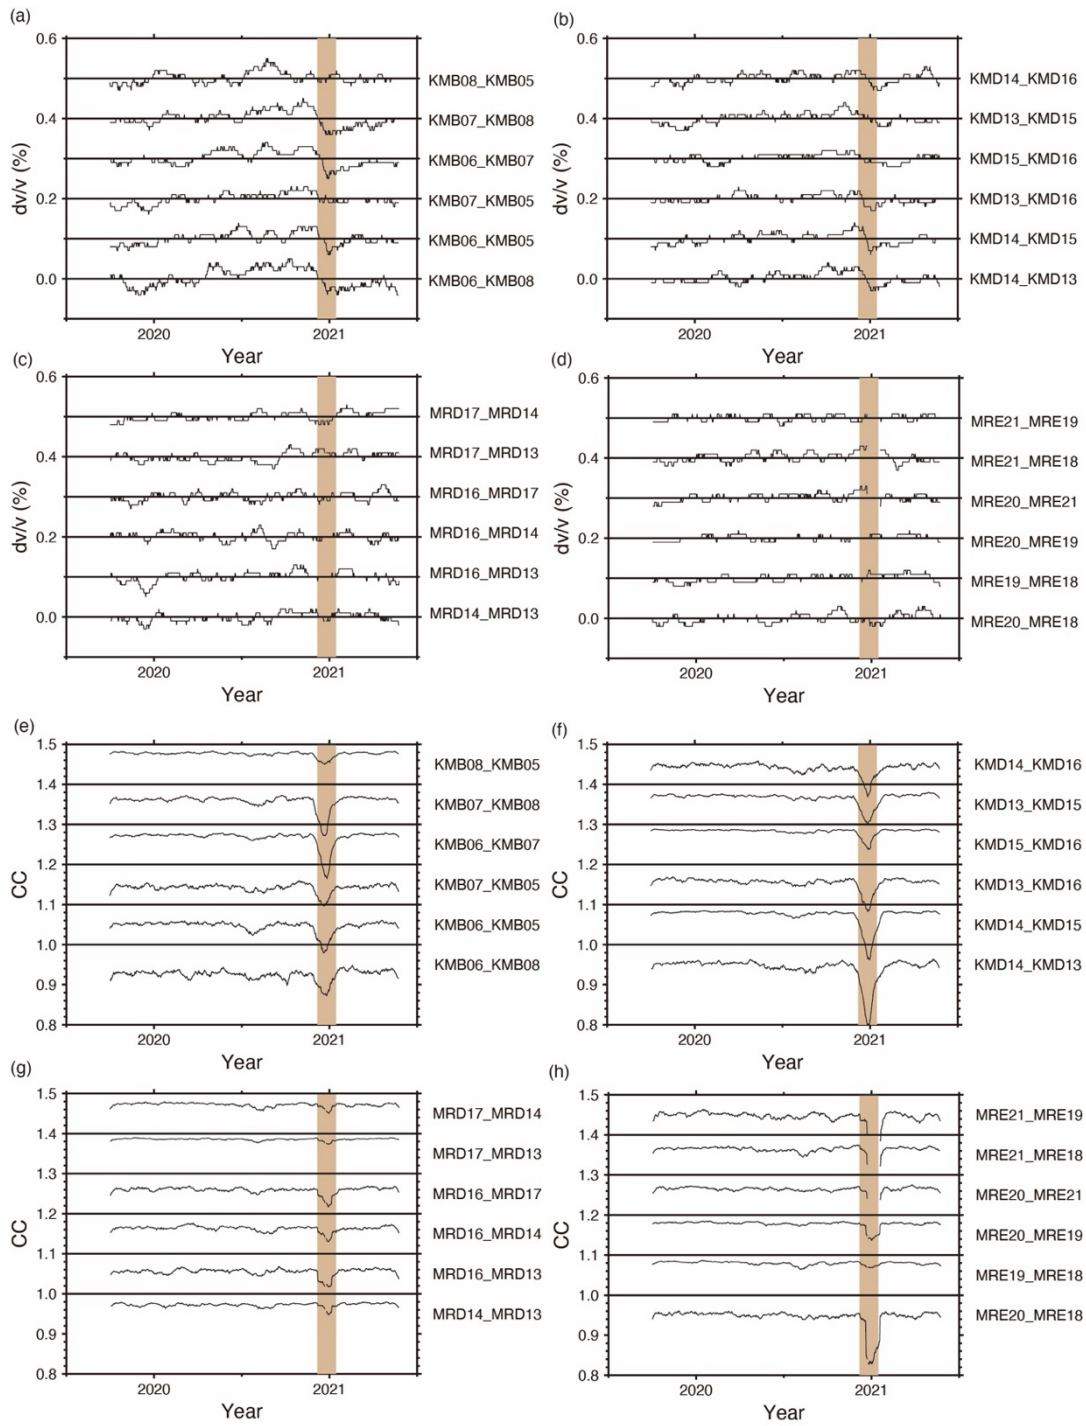

Figure S2: Same as Fig. 4, but for other nodes.
